# Supplementary figures and images for: Human Beauty according to Artificial Intelligence
Source: PubMed Central journal article supplement — Plast Reconstr Surg Glob Open. 2023 Jul 26;11(7):e5153. doi: 10.1097/GOX.0000000000005153 (PMC10371313; doi:10.1097/gox.0000000000005153), 2023-07-26

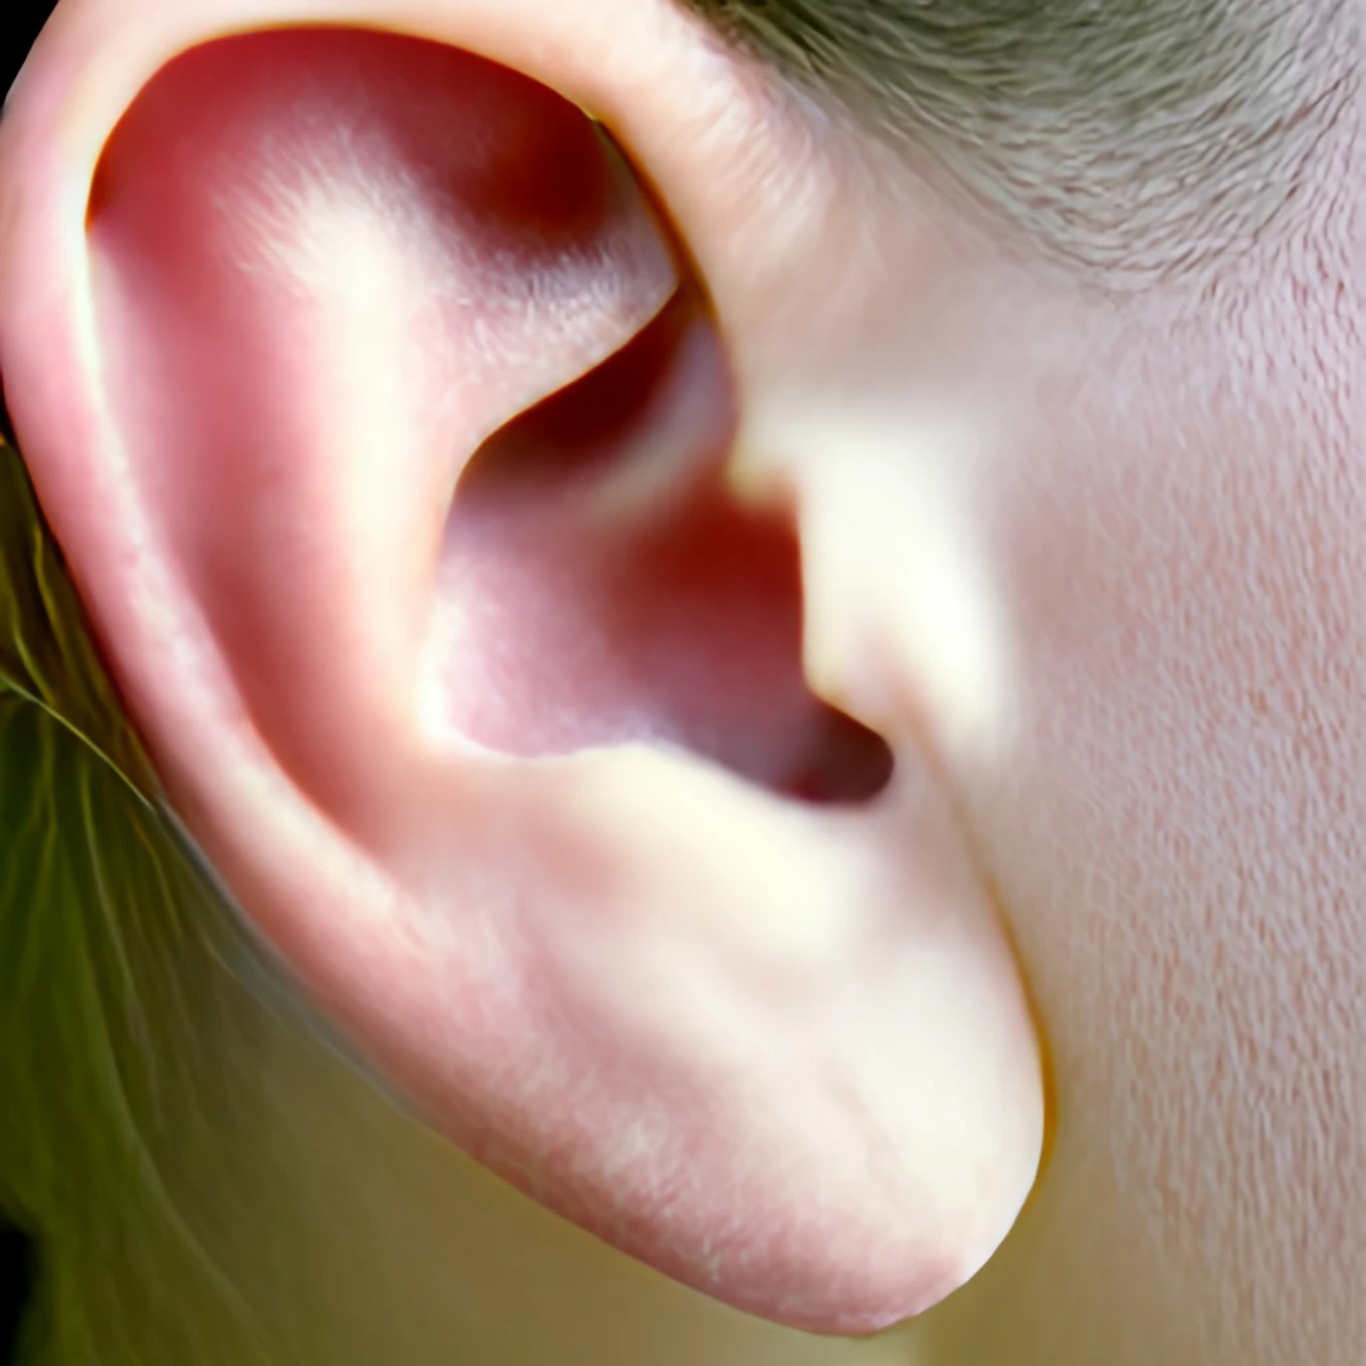

Supplement: gox-11-e5153-s001.pdf [file gox-11-e5153-s001.pdf]

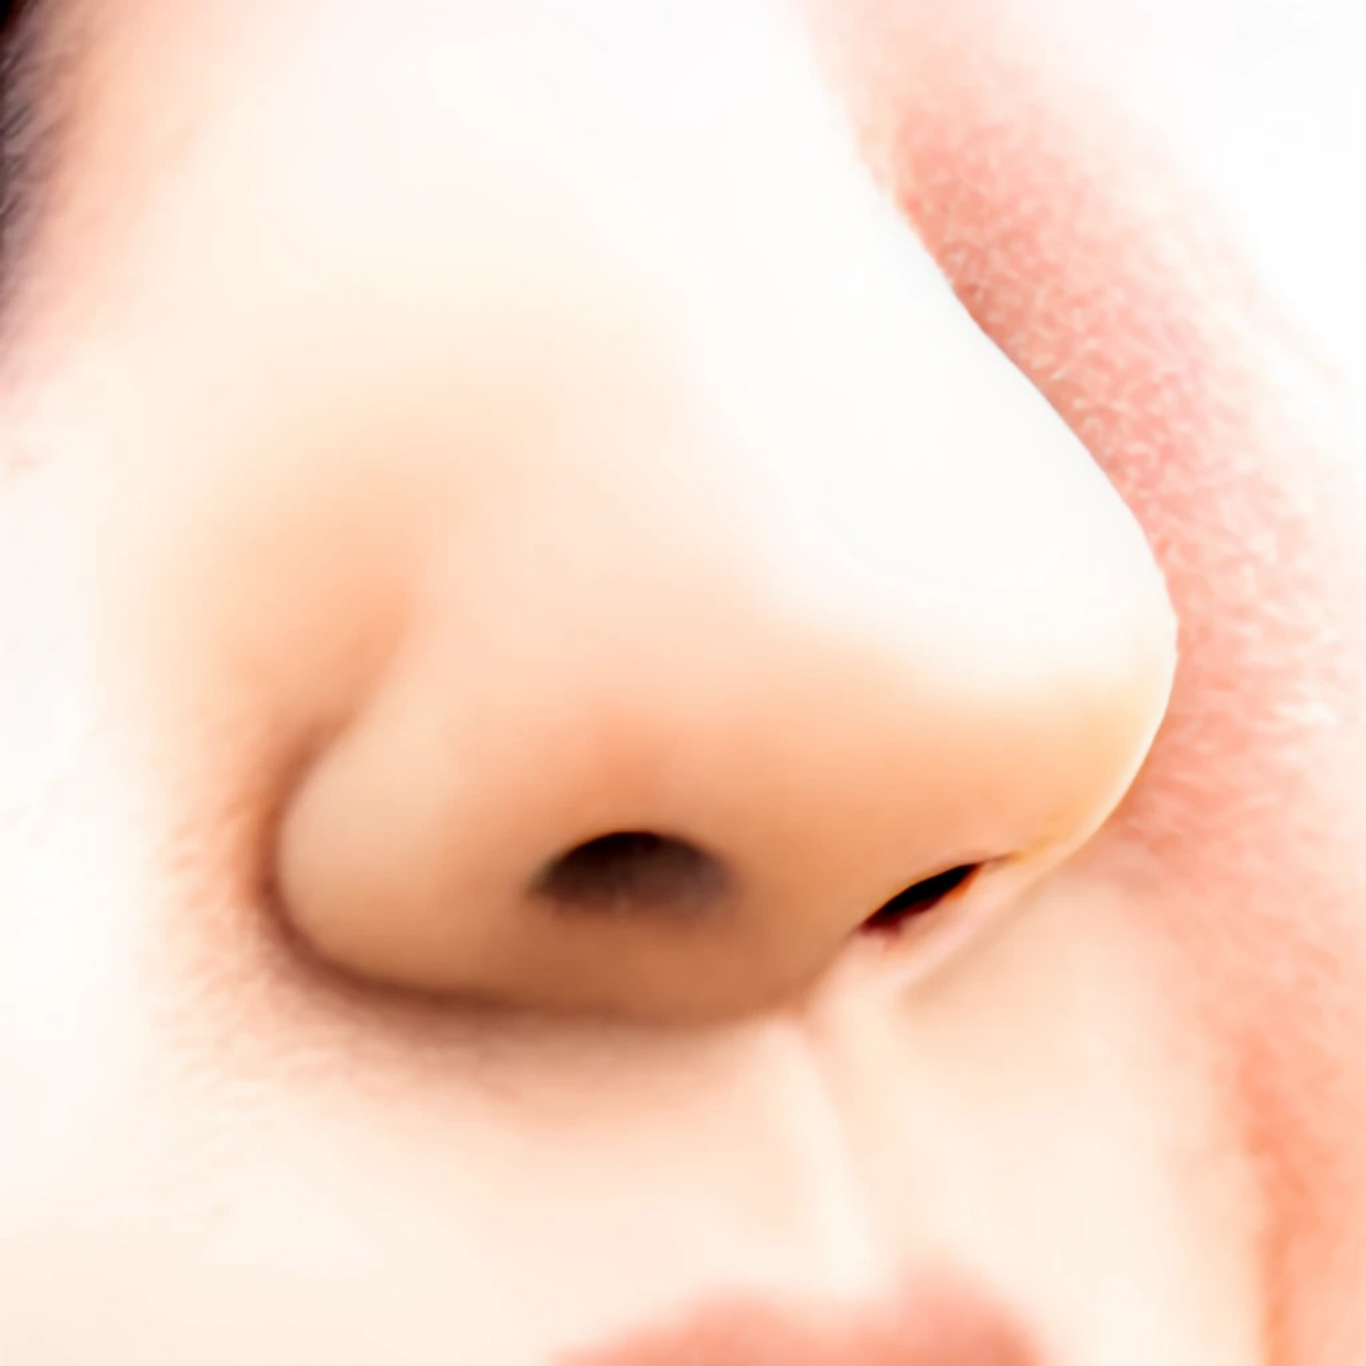

Supplement: gox-11-e5153-s002.pdf [file gox-11-e5153-s002.pdf]
